# Supplementary material
Source: HighWire-hosted journal article supplement (https://bmjopenquality.bmj.com/highwire/filestream/136238/field_highwire_adjunct_files/1/ds4134.docx)
Supplement: ds4134.docx [file ds4134.docx]

|  | Name | Hosp # | Date | Time | Cons | EWS | DVT | Abx | Plan | D/c | Sign | Blp |
| --- | --- | --- | --- | --- | --- | --- | --- | --- | --- | --- | --- | --- |
| Weekday | 92 | 90 | 46 | 33 | 94 | 33 | 92 | 10 | 63 | 56 | 4 | 2 |
| w/end | 100 | 100 | 35 | 0 | 100 | 0 | 100 | 15 | 88 | 88 | 8 | 8 |
| Average | **89** | **85** | **51** | **49** | **95** | **49** | **92** | **8** | **59** | **53** | **4** | **3** |
| **Initial results: Percentage compliance with RCS guidelines** | | | | | | | | | | | | |

Graph showing initial percentage compliance with RCS guidelines.

Graph showing percentage of criteria met per entry in loop 1.

Example of word document prefilled with data from spreadsheet with space for consultant daily plan.
